# Supplementary material for: Reassessing the role and lifetime of Q x in the energy transfer dynamics of chlorophyll a
Source: Royal Society of Chemistry journal article supplement (doi:10.1039/d4sc06441k), 2024-11-27
Supplement: d4sc06441k1.pdf [file d4sc06441k1.pdf]

1 **Supporting Information for**  
2 **Reassessing the role and lifetime of  $Q_x$  in the energy transfer**  
3 **dynamics of Chlorophyll *a***

4  
5 Erika Keil<sup>1</sup>, Ajeet Kumar<sup>1</sup>, Lena Bäuml<sup>2</sup>, Sebastian Reiter<sup>2</sup>, Erling Thyrgaug<sup>1</sup>, Simone Moser<sup>3</sup>,  
6 Christopher D. P. Duffy<sup>4</sup>, Regina de Vivie-Riedle<sup>2</sup>, and Jürgen Hauer<sup>1\*</sup>

7  
8 <sup>1</sup>*Technical University of Munich, Germany; TUM School of Natural Sciences, Department of*  
9 *Chemistry, Lichtenbergstrasse 4, 85748 Garching, Germany.*

10 <sup>2</sup>*Department of Chemistry, Ludwig-Maximilians-Universität München, Butenandtstr. 11, 81377*  
11 *Munich, Germany.*

12 <sup>3</sup>*Institute of Pharmacy, Department of Pharmacognosy, University of Innsbruck, Austria.*

13 <sup>4</sup>*Digital Environment Research Institute, Queen Mary University of London, London E1 4NS, U.K.*

14 *\*Jürgen Hauer*

15  
16 **Email:** [juergen.hauer@tum.de](mailto:juergen.hauer@tum.de)

17  
18  
19 **This PDF file includes:**

20  
21 Supporting text  
22 Figures S1 to S12  
23 Tables T1 and T2  
24 Reference list

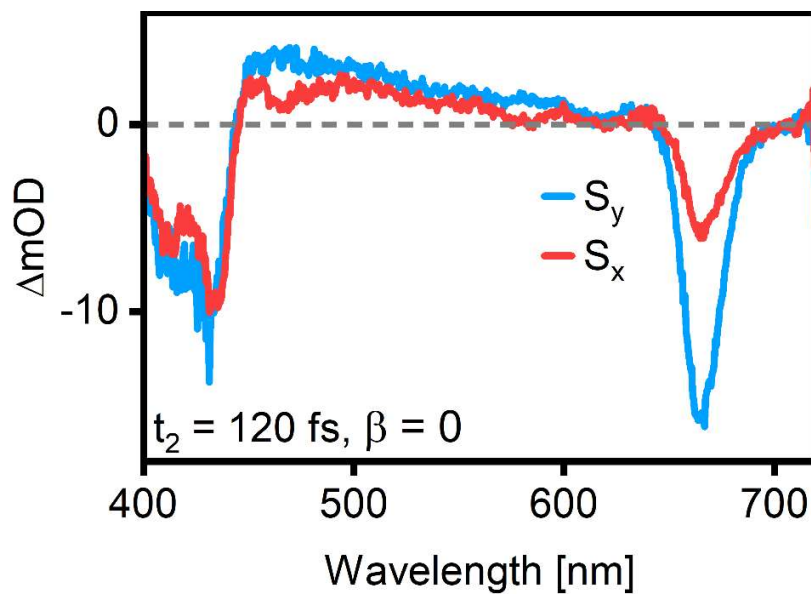

25  
26  
27  
28  
29

**Figure S1:** Example for the decomposition of polarized Chl *a* (TA) spectra into x-polarized ( $S_x$ ) and y-polarized ( $S_y$ ) components assuming orthogonal TDMs ( $\beta = 0^\circ$ ). The x-polarized spectrum is clearly polluted by y-polarized features: The  $Q_y$  band peak is visible in both spectra but should ideally be suppressed in  $S_x$ .

30

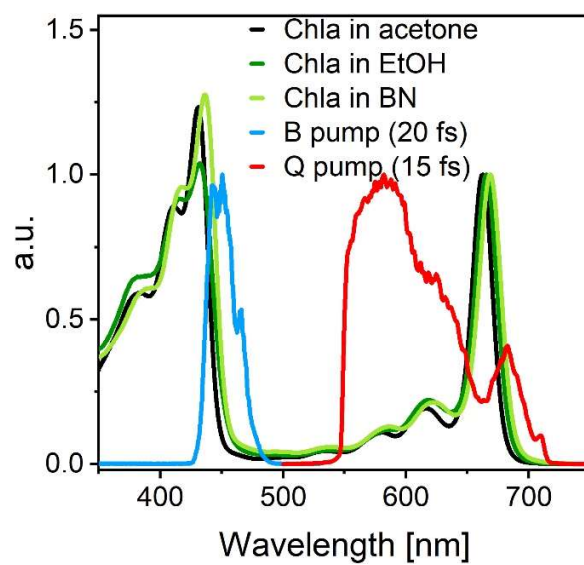

31  
32  
33  
34

**Figure S2:** Normalized absorption spectra of Chl *a* in acetone, ethanol (EtOH), and benzonitrile (BN). Separate TA experiments were performed with a 20 fs pump pulse in the blue spectral region (B pump) and a 15 fs pump pulse in the red spectral region (Q pump).

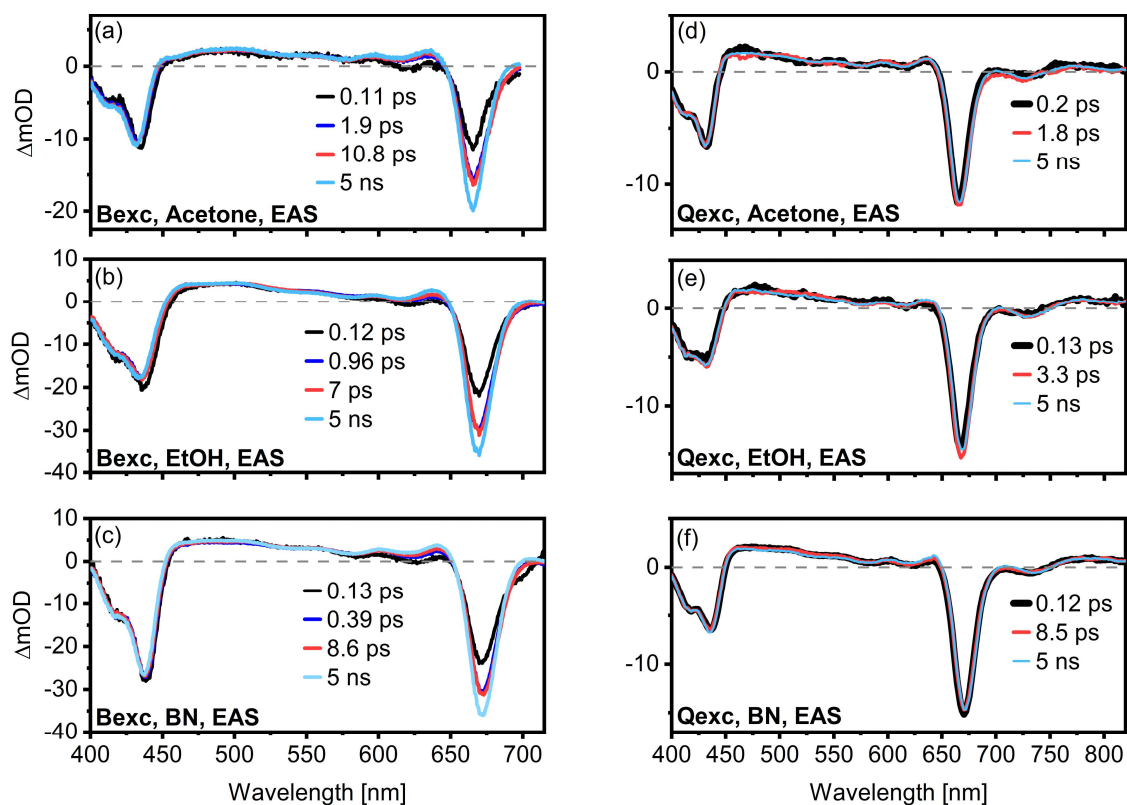

35  
36  
37  
38  
39

**Figure S3:** EAS and lifetimes extracted from global analysis of Chl *a* in acetone, EtOH and BN after excitation in the B-band (a-c) and after excitation in the Q-band (d-f).

40

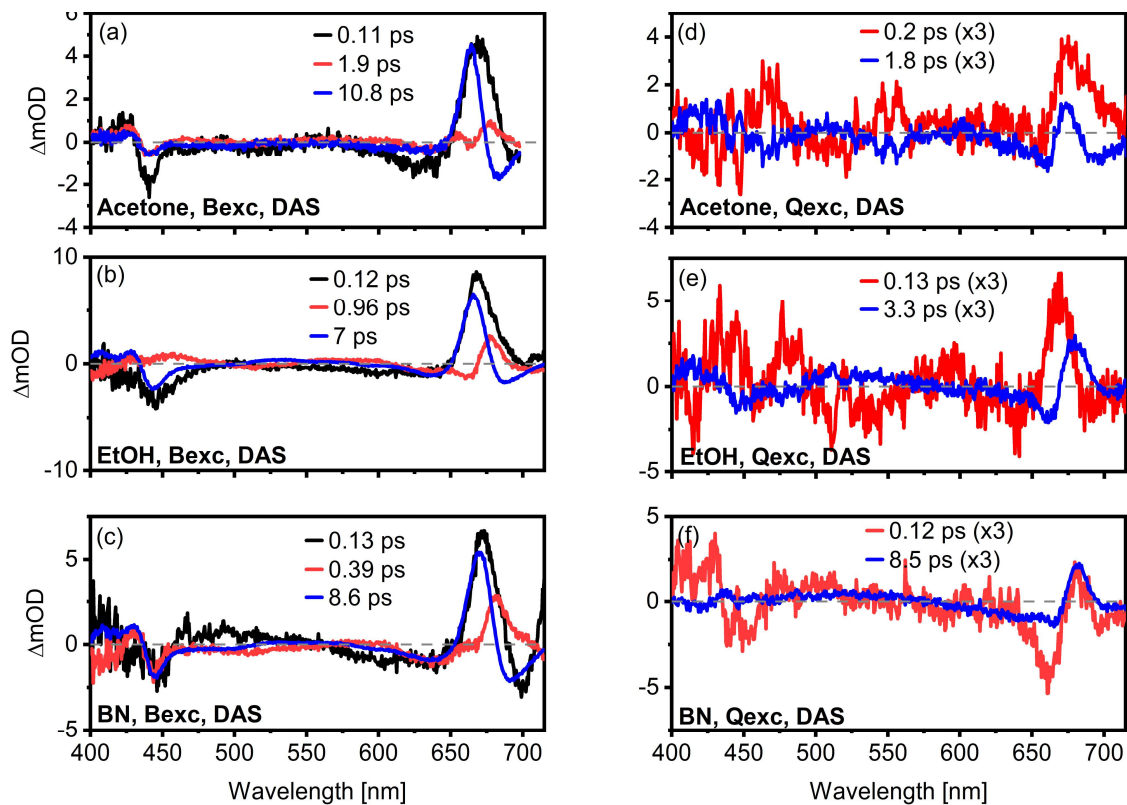

41

42 **Figure S4:** DAS and lifetimes extracted from global analysis of Chl *a* in acetone, EtOH, and BN after excitation  
43 in the B-band (a-c) and the Q-band (d-f).

44

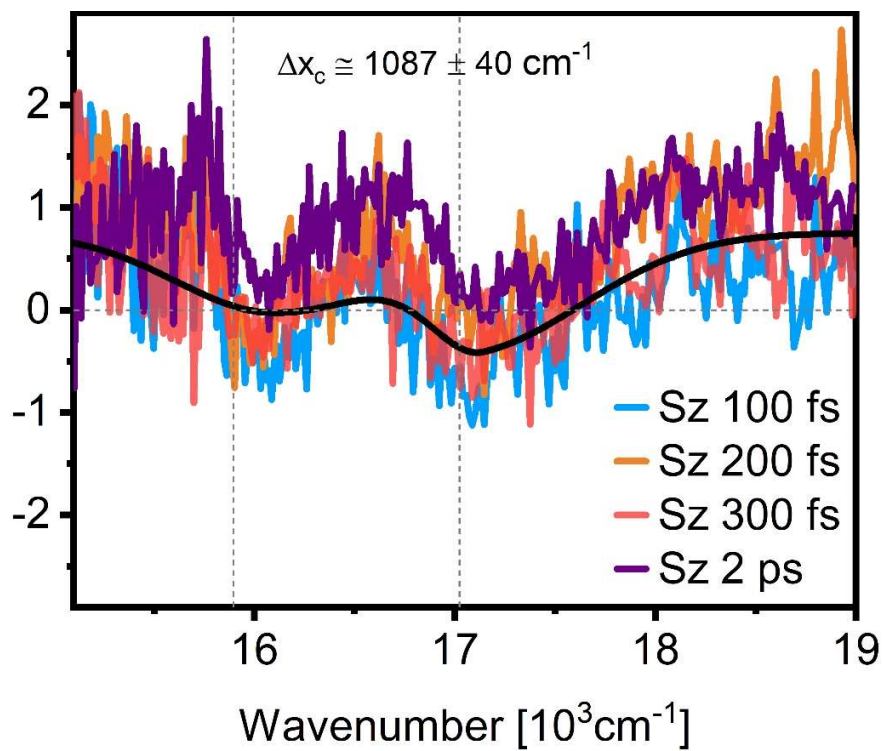

45

46

47

48

**Figure S5:**  $S_x$  spectra obtained from polarized TA at different time delays. The lineshape remains identical regardless of the population time (bigaussian fit shown in black). The  $Q_x$  GSB features are evident, but no  $Q_x$  SE or ESA feature is visible at any delay.

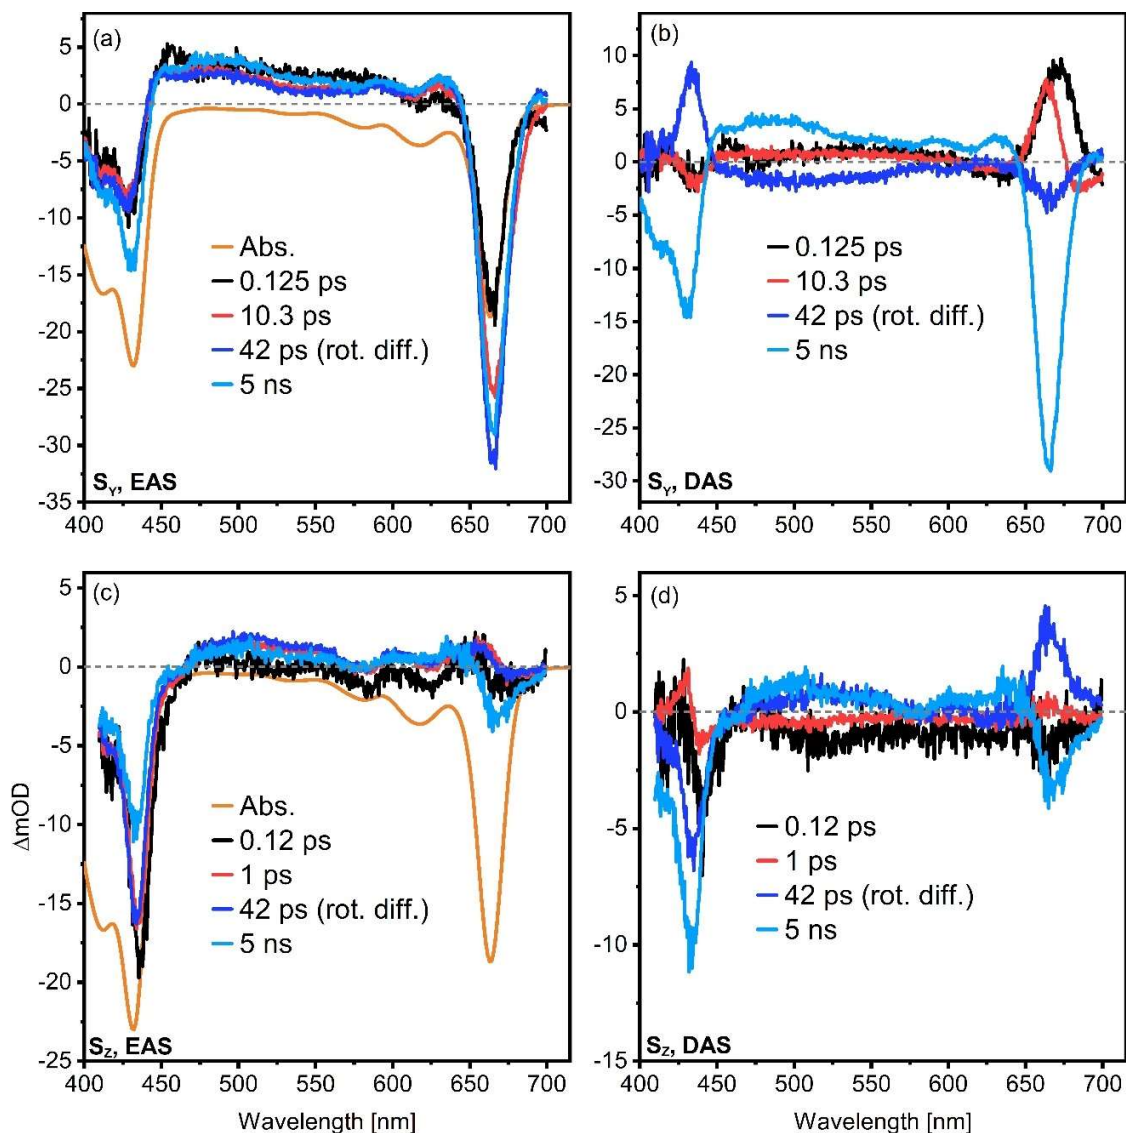

50  
51  
52  
53  
54  
55  
56  
57  
58  
59  
60  
61  
62  
63  
64  
65

**Figure S6:** EAS (a, c) and DAS (b, d) from the global analysis of  $S_y$  (top row) and  $S_x$  (bottom row) as obtained by decomposition of the polarized TA data of Chl  $\alpha$ .

Four similar time constants are needed to fit the two datasets. The longest component (5 ns) is just the radiative lifetime of Chl  $\alpha$ . The second longest component, about 40 ps, is likely the rotational diffusion constant of Chl  $\alpha$  in acetone, which can be calculated as 55 ps (1). This is evident in the  $S_x$  dataset, in which the  $Q_y$  band is suppressed at early times but comes back with the 40 ps constant. We see rotational diffusion because these are not MA datasets. In the GA for the MA dataset (cf. main text, Figure 2), this component is not there, as expected. The 1-10 ps component corresponds to the 11 ps component in the MA global analysis, which we assigned to some small structural relaxation process. Finally, the shortest process has a lifetime of ca. 120 fs in both datasets and correlates with a loss in the  $B_x$ -band GSB region (c) and an increase of the  $Q_y$  amplitude (a). We can, therefore, assign it to  $B(x) \rightarrow Q_y$  transfer. There is no evidence of an intermediate process including the  $Q_x$  band and no spectral features that could be assigned to a  $Q_x$  SE or ESA.

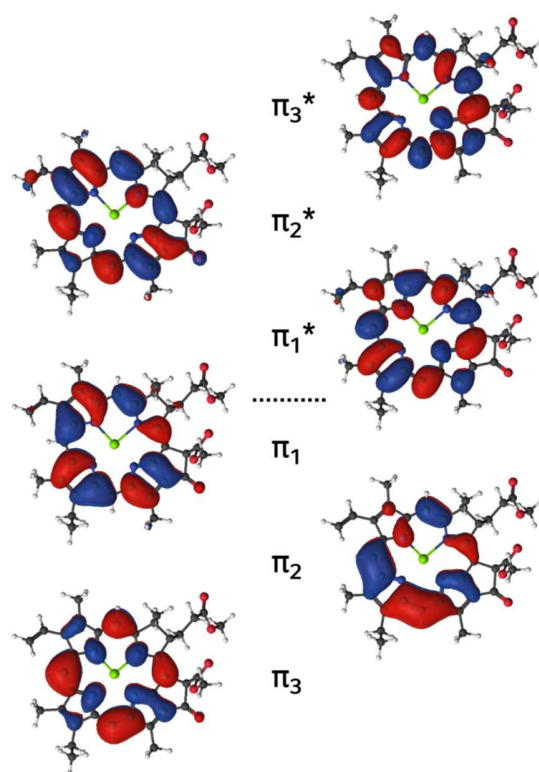

68  
69 **Figure S7:** Active space used in the XMS-CASPT2 calculations (Isovalue: 0.02). The active space contains  
70 the four Gouterman orbitals ( $\pi_2$ ,  $\pi_1$ ,  $\pi_1^*$ ,  $\pi_2^*$ ) as well as one additional pair of  $\pi/\pi^*$  orbitals.



71 **Coordinate Selection for Quantum Dynamics**

72 The overlap  $s_i$  of each normal mode  $\mathbf{q}_i$  at the  $Q_y$  minimum energy geometry with the non-adiabatic  
 73 coupling vector  $\mathbf{f}$  was calculated in Cartesian coordinates according to

$$s_i = \frac{\mathbf{q}_i \cdot \mathbf{f}}{\mathbf{f} \cdot \mathbf{f}}. \quad (1)$$

74 As the normal modes are orthogonal, the squared overlap  $s_i^2$  provides the weight with which each normal  
 75 mode contributes to the coupling. The results are summarized in table S10. Cartesian Coordinates of  
 76 optimized geometries, normal modes and the NAC vector are provided in a zip-archive alongside this  
 77 document.

78 **Table T1:** Overlap of normal modes with the non-adiabatic coupling vector at the  $Q_y$  minimum geometry.

79 The harmonic vibrational frequency  $\nu$  of each mode is also listed.

80

| mode | $\nu$ [cm <sup>-1</sup> ] | overlap $s_i$ | squared overlap $s_i^2$ |
|------|---------------------------|---------------|-------------------------|
| 171  | 1489.52                   | 0.468476      | 0.219470                |
| 198  | 1639.56                   | 0.336930      | 0.113522                |
| 193  | 1543.71                   | 0.268399      | 0.072038                |
| 176  | 1501.62                   | 0.228649      | 0.052280                |
| 197  | 1633.79                   | 0.225903      | 0.051032                |
| 170  | 1482.89                   | 0.222164      | 0.049357                |
| 183  | 1516.32                   | 0.194171      | 0.037702                |
| 154  | 1358.83                   | 0.166046      | 0.027571                |
| 159  | 1409.96                   | 0.164634      | 0.027104                |
| 158  | 1399.21                   | 0.160762      | 0.025845                |
| 184  | 1517.42                   | 0.151761      | 0.023032                |
| 196  | 1606.08                   | 0.148694      | 0.022110                |
| 168  | 1450.34                   | 0.147902      | 0.021875                |
| 157  | 1393.61                   | 0.139835      | 0.019554                |
| 172  | 1490.46                   | 0.125946      | 0.015862                |
| 166  | 1441.60                   | 0.121086      | 0.014662                |
| 160  | 1419.62                   | 0.117629      | 0.013836                |
| 195  | 1571.62                   | 0.117460      | 0.013797                |
| 169  | 1472.45                   | 0.112610      | 0.012681                |
| 192  | 1533.87                   | 0.105950      | 0.011225                |
| 138  | 1228.72                   | 0.098410      | 0.009684                |
| 131  | 1182.08                   | 0.095332      | 0.009088                |
| 179  | 1511.36                   | 0.091050      | 0.008290                |
| 127  | 1149.79                   | 0.087146      | 0.007594                |
| 239  | 3232.21                   | 0.078859      | 0.006219                |
| 136  | 1216.17                   | 0.078008      | 0.006085                |
| 155  | 1367.18                   | 0.077860      | 0.006062                |
| 103  | 940.19                    | 0.076822      | 0.005902                |
| 92   | 813.35                    | 0.071683      | 0.005138                |
| 109  | 1014.70                   | 0.070877      | 0.005024                |
| 137  | 1216.81                   | 0.070459      | 0.004964                |
| 130  | 1176.90                   | 0.064210      | 0.004123                |
| 147  | 1313.78                   | 0.058971      | 0.003478                |

|     |         |          |          |
|-----|---------|----------|----------|
| 186 | 1519.23 | 0.058032 | 0.003368 |
| 77  | 706.93  | 0.055054 | 0.003031 |
| 86  | 767.21  | 0.053081 | 0.002818 |
| 141 | 1246.94 | 0.052497 | 0.002756 |
| 238 | 3212.46 | 0.050883 | 0.002589 |
| 65  | 516.76  | 0.050275 | 0.002528 |
| 182 | 1514.10 | 0.050030 | 0.002503 |
| 62  | 485.29  | 0.049721 | 0.002472 |
| 135 | 1203.19 | 0.047865 | 0.002291 |
| 144 | 1284.54 | 0.047575 | 0.002263 |
| 102 | 931.18  | 0.046559 | 0.002168 |
| 153 | 1355.47 | 0.046185 | 0.002133 |
| 185 | 1518.12 | 0.045232 | 0.002046 |
| 200 | 1726.35 | 0.043242 | 0.001870 |
| 91  | 800.64  | 0.042964 | 0.001846 |
| 163 | 1433.88 | 0.041305 | 0.001706 |
| 142 | 1274.88 | 0.041273 | 0.001703 |
| 145 | 1300.60 | 0.040614 | 0.001649 |
| 167 | 1443.52 | 0.037995 | 0.001444 |
| 114 | 1054.02 | 0.036700 | 0.001347 |
| 187 | 1519.81 | 0.036451 | 0.001329 |
| 106 | 960.34  | 0.035057 | 0.001229 |
| 132 | 1195.84 | 0.034141 | 0.001166 |
| 66  | 549.12  | 0.033890 | 0.001149 |
| 156 | 1375.25 | 0.032961 | 0.001086 |
| 111 | 1028.74 | 0.031913 | 0.001018 |
| 100 | 890.86  | 0.031648 | 0.001002 |
| 201 | 1740.71 | 0.030857 | 0.000952 |
| 104 | 948.91  | 0.030791 | 0.000948 |
| 123 | 1099.03 | 0.030051 | 0.000903 |
| 57  | 412.36  | 0.029338 | 0.000861 |
| 174 | 1497.37 | 0.027636 | 0.000764 |
| 203 | 1826.63 | 0.027591 | 0.000761 |
| 151 | 1339.18 | 0.025395 | 0.000645 |
| 162 | 1429.58 | 0.025260 | 0.000638 |
| 98  | 883.09  | 0.024884 | 0.000619 |
| 68  | 585.57  | 0.024712 | 0.000611 |
| 60  | 446.36  | 0.023613 | 0.000558 |
| 67  | 575.03  | 0.023264 | 0.000541 |
| 76  | 688.90  | 0.022891 | 0.000524 |
| 108 | 1001.97 | 0.022860 | 0.000523 |
| 99  | 889.88  | 0.022682 | 0.000514 |
| 84  | 747.94  | 0.022526 | 0.000507 |
| 107 | 977.02  | 0.022412 | 0.000502 |
| 79  | 726.43  | 0.022146 | 0.000490 |
| 56  | 391.61  | 0.022092 | 0.000488 |
| 121 | 1086.82 | 0.021752 | 0.000473 |
| 70  | 602.42  | 0.020914 | 0.000437 |
| 126 | 1140.56 | 0.019331 | 0.000374 |
| 119 | 1076.40 | 0.018372 | 0.000338 |

|     |         |          |          |
|-----|---------|----------|----------|
| 202 | 1818.16 | 0.017645 | 0.000311 |
| 150 | 1332.28 | 0.016846 | 0.000284 |
| 52  | 361.11  | 0.016638 | 0.000277 |
| 240 | 3248.77 | 0.016102 | 0.000259 |
| 83  | 743.88  | 0.015620 | 0.000244 |
| 189 | 1522.15 | 0.015497 | 0.000240 |
| 199 | 1654.97 | 0.014702 | 0.000216 |
| 125 | 1125.48 | 0.014557 | 0.000212 |
| 122 | 1089.25 | 0.014452 | 0.000209 |
| 194 | 1556.69 | 0.014387 | 0.000207 |
| 112 | 1034.58 | 0.014193 | 0.000201 |
| 73  | 652.74  | 0.013846 | 0.000192 |
| 61  | 469.02  | 0.013618 | 0.000185 |
| 128 | 1152.25 | 0.013355 | 0.000178 |
| 55  | 385.00  | 0.012198 | 0.000149 |
| 113 | 1044.03 | 0.012054 | 0.000145 |
| 173 | 1495.15 | 0.011597 | 0.000134 |
| 90  | 799.58  | 0.011249 | 0.000127 |
| 177 | 1510.35 | 0.011083 | 0.000123 |
| 161 | 1421.81 | 0.010835 | 0.000117 |
| 80  | 732.18  | 0.010788 | 0.000116 |
| 47  | 302.30  | 0.010533 | 0.000111 |
| 175 | 1498.79 | 0.010456 | 0.000109 |
| 143 | 1276.56 | 0.010157 | 0.000103 |
| 190 | 1523.82 | 0.010121 | 0.000102 |
| 188 | 1521.07 | 0.009975 | 0.000100 |
| 148 | 1319.48 | 0.009393 | 0.000088 |
| 72  | 637.36  | 0.009208 | 0.000085 |
| 181 | 1513.06 | 0.009177 | 0.000084 |
| 205 | 3049.02 | 0.008800 | 0.000077 |
| 50  | 323.22  | 0.008697 | 0.000076 |
| 25  | 147.34  | 0.008680 | 0.000075 |
| 207 | 3054.00 | 0.008621 | 0.000074 |
| 58  | 431.57  | 0.008437 | 0.000071 |
| 45  | 292.40  | 0.008101 | 0.000066 |
| 211 | 3064.17 | 0.008043 | 0.000065 |
| 93  | 818.97  | 0.008026 | 0.000064 |
| 21  | 128.13  | 0.007844 | 0.000062 |
| 149 | 1326.96 | 0.007808 | 0.000061 |
| 42  | 264.18  | 0.007730 | 0.000060 |
| 37  | 227.53  | 0.007649 | 0.000059 |
| 64  | 506.07  | 0.007574 | 0.000057 |
| 41  | 256.67  | 0.007552 | 0.000057 |
| 97  | 878.02  | 0.006917 | 0.000048 |
| 87  | 772.69  | 0.006870 | 0.000047 |
| 115 | 1067.71 | 0.006863 | 0.000047 |
| 18  | 112.77  | 0.006758 | 0.000046 |
| 75  | 673.66  | 0.006689 | 0.000045 |
| 88  | 777.37  | 0.006579 | 0.000043 |
| 69  | 588.77  | 0.006484 | 0.000042 |

|     |         |          |          |
|-----|---------|----------|----------|
| 26  | 153.06  | 0.006382 | 0.000041 |
| 146 | 1300.74 | 0.006263 | 0.000039 |
| 85  | 756.34  | 0.006162 | 0.000038 |
| 63  | 498.54  | 0.006037 | 0.000036 |
| 129 | 1169.97 | 0.005920 | 0.000035 |
| 27  | 156.50  | 0.005857 | 0.000034 |
| 225 | 3129.78 | 0.005814 | 0.000034 |
| 43  | 276.92  | 0.005756 | 0.000033 |
| 212 | 3074.01 | 0.005608 | 0.000031 |
| 116 | 1069.17 | 0.005597 | 0.000031 |
| 82  | 742.24  | 0.005539 | 0.000031 |
| 206 | 3052.73 | 0.005507 | 0.000030 |
| 39  | 240.13  | 0.005398 | 0.000029 |
| 54  | 379.39  | 0.005319 | 0.000028 |
| 74  | 664.19  | 0.005300 | 0.000028 |
| 165 | 1438.20 | 0.005192 | 0.000027 |
| 237 | 3198.74 | 0.005062 | 0.000026 |
| 204 | 1849.89 | 0.004908 | 0.000024 |
| 81  | 736.21  | 0.004895 | 0.000024 |
| 46  | 296.56  | 0.004845 | 0.000023 |
| 71  | 632.93  | 0.004800 | 0.000023 |
| 101 | 892.81  | 0.004788 | 0.000023 |
| 140 | 1231.73 | 0.004762 | 0.000023 |
| 34  | 208.25  | 0.004712 | 0.000022 |
| 234 | 3166.85 | 0.004615 | 0.000021 |
| 32  | 194.86  | 0.004545 | 0.000021 |
| 78  | 719.03  | 0.004413 | 0.000019 |
| 89  | 787.27  | 0.004375 | 0.000019 |
| 20  | 121.56  | 0.004159 | 0.000017 |
| 14  | 80.02   | 0.004023 | 0.000016 |
| 5   | 28.61   | 0.003795 | 0.000014 |
| 120 | 1082.39 | 0.003780 | 0.000014 |
| 35  | 212.29  | 0.003658 | 0.000013 |
| 44  | 286.85  | 0.003559 | 0.000013 |
| 110 | 1024.89 | 0.003366 | 0.000011 |
| 13  | 79.83   | 0.003268 | 0.000011 |
| 208 | 3055.34 | 0.003146 | 0.000010 |
| 228 | 3143.21 | 0.002989 | 0.000009 |
| 23  | 136.53  | 0.002925 | 0.000009 |
| 49  | 318.99  | 0.002921 | 0.000009 |
| 22  | 134.55  | 0.002791 | 0.000008 |
| 40  | 251.39  | 0.002752 | 0.000008 |
| 51  | 354.82  | 0.002739 | 0.000008 |
| 218 | 3098.43 | 0.002520 | 0.000006 |
| 210 | 3058.74 | 0.002482 | 0.000006 |
| 53  | 374.23  | 0.002384 | 0.000006 |
| 219 | 3098.55 | 0.002312 | 0.000005 |
| 48  | 308.26  | 0.002305 | 0.000005 |
| 230 | 3151.43 | 0.002279 | 0.000005 |
| 231 | 3153.20 | 0.002199 | 0.000005 |

|     |         |          |          |
|-----|---------|----------|----------|
| 164 | 1435.55 | 0.002111 | 0.000004 |
| 94  | 835.85  | 0.002067 | 0.000004 |
| 10  | 59.44   | 0.002051 | 0.000004 |
| 133 | 1197.06 | 0.001965 | 0.000004 |
| 24  | 144.09  | 0.001921 | 0.000004 |
| 29  | 176.49  | 0.001851 | 0.000003 |
| 1   | 13.23   | 0.001784 | 0.000003 |
| 139 | 1230.97 | 0.001778 | 0.000003 |
| 31  | 193.04  | 0.001712 | 0.000003 |
| 38  | 236.89  | 0.001691 | 0.000003 |
| 105 | 957.06  | 0.001677 | 0.000003 |
| 215 | 3085.96 | 0.001584 | 0.000003 |
| 59  | 434.58  | 0.001570 | 0.000002 |
| 95  | 858.33  | 0.001443 | 0.000002 |
| 96  | 871.61  | 0.001436 | 0.000002 |
| 180 | 1512.75 | 0.001423 | 0.000002 |
| 19  | 116.04  | 0.001419 | 0.000002 |
| 118 | 1070.66 | 0.001409 | 0.000002 |
| 36  | 218.85  | 0.001376 | 0.000002 |
| 222 | 3123.63 | 0.001313 | 0.000002 |
| 220 | 3100.93 | 0.001307 | 0.000002 |
| 229 | 3147.21 | 0.001230 | 0.000002 |
| 178 | 1510.99 | 0.001208 | 0.000001 |
| 2   | 17.62   | 0.001206 | 0.000001 |
| 3   | 21.07   | 0.001203 | 0.000001 |
| 11  | 64.79   | 0.001126 | 0.000001 |
| 217 | 3094.64 | 0.001085 | 0.000001 |
| 226 | 3131.53 | 0.001075 | 0.000001 |
| 117 | 1069.33 | 0.001053 | 0.000001 |
| 6   | 39.84   | 0.001040 | 0.000001 |
| 134 | 1200.53 | 0.000951 | 0.000001 |
| 33  | 203.55  | 0.000856 | 0.000001 |
| 191 | 1525.15 | 0.000731 | 0.000001 |
| 227 | 3140.81 | 0.000729 | 0.000001 |
| 7   | 46.69   | 0.000669 | 0.000000 |
| 9   | 54.35   | 0.000655 | 0.000000 |
| 4   | 24.34   | 0.000620 | 0.000000 |
| 28  | 172.27  | 0.000610 | 0.000000 |
| 30  | 180.11  | 0.000561 | 0.000000 |
| 221 | 3106.76 | 0.000546 | 0.000000 |
| 12  | 69.96   | 0.000509 | 0.000000 |
| 152 | 1348.32 | 0.000492 | 0.000000 |
| 8   | 50.08   | 0.000434 | 0.000000 |
| 16  | 98.97   | 0.000411 | 0.000000 |
| 214 | 3084.01 | 0.000368 | 0.000000 |
| 223 | 3125.75 | 0.000315 | 0.000000 |
| 15  | 85.38   | 0.000313 | 0.000000 |
| 213 | 3075.25 | 0.000252 | 0.000000 |
| 236 | 3194.62 | 0.000183 | 0.000000 |
| 224 | 3129.26 | 0.000170 | 0.000000 |

|     |         |          |          |
|-----|---------|----------|----------|
| 209 | 3057.03 | 0.000157 | 0.000000 |
| 17  | 106.55  | 0.000128 | 0.000000 |
| 235 | 3193.42 | 0.000121 | 0.000000 |
| 124 | 1106.41 | 0.000107 | 0.000000 |
| 233 | 3162.19 | 0.000050 | 0.000000 |
| 216 | 3093.82 | 0.000021 | 0.000000 |
| 232 | 3158.30 | 0.000011 | 0.000000 |

---

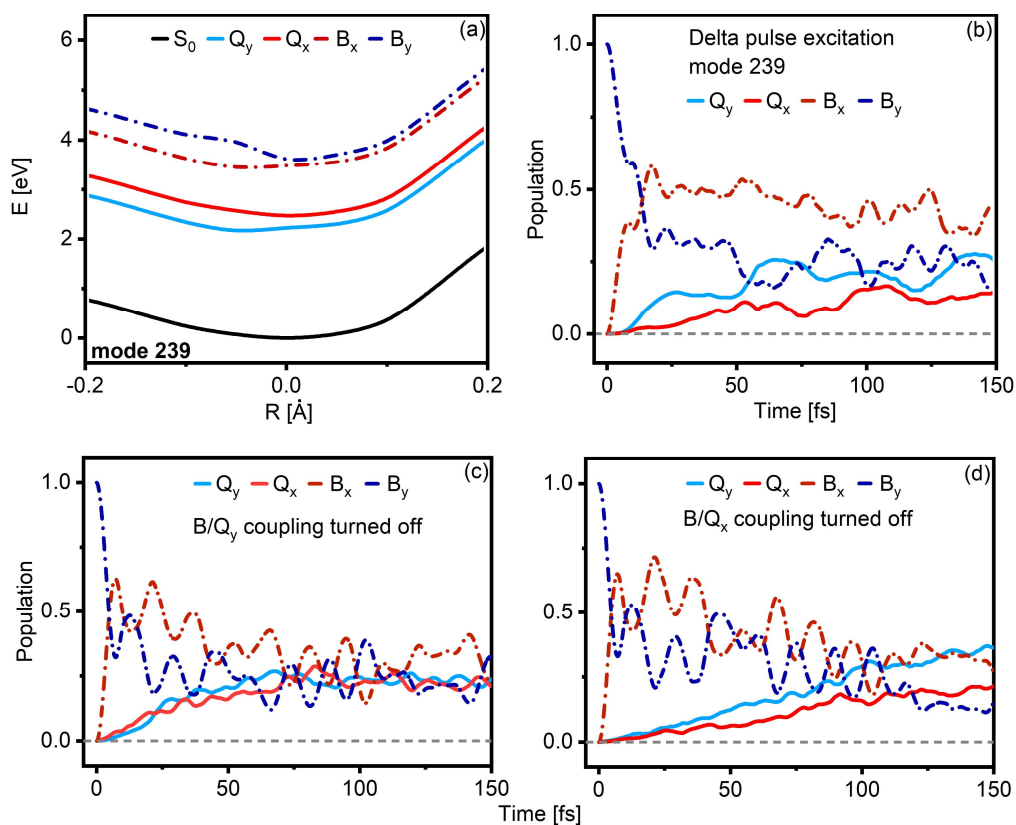

82  
 83 **Figure S8:** Cuts through the potential energy surfaces of Chl *a* along a mode with a weaker projection on  
 84 the non-adiabatic coupling vector (a). The relative position of the PES, as well as the population dynamics  
 85 for the individual states (b), are similar to that obtained along the mode with the strongest NAC projection.  
 86 The B-to-Q transfer heavily depends on coupling the B band with  $Q_x$ . If this coupling is turned off, the B-to-  
 87 Q transfer slows down significantly (d). On the contrary, if  $B/Q_y$  coupling is turned off, the population  
 88 dynamics do not change much (c). Depicted dynamics are after delta pulse excitation into  $B_y$ .

89 **Modeling the effect of VC and IVR**

90 Excitation of Chl *a* with a visible laser pulse means that a lot of energy is deposited into the vibrational  
 91 modes of the molecule. Energy deposited (directly or indirectly) into a high-lying vibronic state of Q<sub>y</sub> (*v*')  
 92 will relax in a non-linear sequence of intra-molecular vibrational redistribution (IVR), solute-to-solvent  
 93 energy transfer, and equilibration of the solvent. Explicitly modeling all of these interacting processes is a  
 94 significant challenge, so we adopt a simplified approach that uses the concept of an effective molecular  
 95 temperature,  $T_m$ . Assuming that IVR is much faster than energy transfer to the solvent, Chl *a* relaxes first  
 96 from *v*' to a pseudo-equilibrium to which the elevated molecular temperature  $T_m$  can be associated. The  
 97 assumption of fast thermalization kinetics is based on the fact that the local vibrational density of states is  
 98 likely to be significant for a large molecule like Chl *a*. Moreover, we expect the anharmonic couplings  
 99 between modes to be stronger in the excited state than in the ground state. However, this does not  
 100 guarantee that thermalization will happen quickly or even at all. The topology of the vibronic manifold can  
 101 be rather complicated, and the localization of the population on non-thermal trap states can frustrate  
 102 thermalization (2). In our previous work on carotenoids, the thermalization rate on  $S_1$  occurred on a  
 103 timescale  $k_t^{-1} \ll 1$  ps (3), and thermalization times of  $k_t^{-1} \sim 1$  ps have been reported for alkanes (2). We  
 104 consider both cases but don't consider slower thermalization ( $k_t^{-1} \gg 1$  ps), as this would violate the implicit  
 105 time-ordering assumed in our model.

106 After the thermalization process, vibrational energy is transferred to the solvent. In the steady-state  
 107 approximation, this can be viewed as a cooling of the molecule until it is at equilibrium with the bulk solvent.  
 108 We use the approach of Kovalenko et al. (4), where the molecular temperature,  $T_m$ , and the temperature  
 109 of the first solvation shell,  $T_s$  evolve according to

$$\frac{dT_m}{dt} = -\gamma N_s \frac{c_s}{c_m} (T_m - T_s) + \left( \frac{dT_m}{dt} \right)_{heat}$$

111 and

$$\frac{dT_s}{dt} = -\frac{3\chi_s}{R_s^2} (T_s - T_{bulk}) + \gamma N_s \frac{c_s}{c_m} (T_m - T_s)$$

113 The first term on the right-hand side in the first equation represents the collisional energy transfer from the  
 114 molecule to the solvation shell.  $N_s$  is the average number of solvent molecules in the shell, estimated from  
 115 molecular dynamics (MD) simulations.  $c_m$  and  $c_s$  are the heat capacities of the molecule and the solvation  
 116 shell, respectively. The  $\gamma$  parameter is related to the solute-solvent collision rate and is difficult to estimate.  
 117 Here we obtain a crude estimate using Wheeler's theory of liquids (5), in which the solute is surrounded by  
 118 solvent molecules that execute spherical positional fluctuations about a fixed center. Overall, we predict a  
 119 molecule-to-shell transfer time of

$$\tau_{ms} = \frac{1}{\gamma N_s} \frac{c_s}{c_m} \sim 0.4 - 1 \text{ ps}$$

121 which is similar to our previous work on carotenoids(3) and to measurements of molecular cooling of  
 122 stilbene (4). We can additionally define the shell cooling time

$$\tau_{sc} = \frac{R_s^2}{3\chi_s}$$

124 where  $R_s$  is the effective radius of the shell and  $\chi_s$  is the thermal diffusivity of the solvent.  $\tau_{sc}$  is 3-5 ps for  
 125 the solvents considered in this work. The exact values of  $\tau_{ms}$ ,  $\tau_{sc}$ , and all the parameters used in their  
 126 calculation are listed in Table S9.

127 We calculate the evolution of  $T_m$  and  $T_s$ , assuming thermalization on the timescale of  $\sim \tau_{ms}$  ( $\sim 1$  ps) in  
 128 ethanol, benzonitrile, and acetone. We then fit the evolution of  $T_m$  to a bi-exponential function where the  
 129 two fitted lifetimes,  $\tau_r$  and  $\tau_{VC}$ , denote the overall rise (heating) and relaxation (vibrational cooling) times.  
 130 For all solvents,  $\tau_r \sim 1$  ps, and  $\tau_{VC} \sim 7-9$  ps, though with slight variations. The rise and relaxation kinetics  
 131 for B-band excitation ( $E_{Q_y, v'} \sim 22,000 \text{ cm}^{-1}$ ) and direct excitation of  $Q_y$  ( $E_{Q_y, v} \sim 20,000 \text{ cm}^{-1}$ ) are identical,  
 132 but in the latter case the maximum  $T_m$  is lower. Experimentally, these heating and cooling processes should  
 133 affect the lineshape of the Chl *a* TA spectra, and we expect to see some thermal broadening of  $Q_y$  over  $\sim 1$   
 134 ps as the maximum  $T_m$  is achieved. The fastest rise in  $T_m$  is predicted for benzonitrile, followed by acetone  
 135 and then EtOH. We then expect the thermal broadening to decrease over  $\sim 10$  ps as the population of low-  
 136 frequency vibrational modes decreases while the solute and solvent shell re-equilibrate with the solvent.



137 Again, we predict a solvent dependence for this as molecular cooling and shell cooling (which has a knock-  
 138 on effect on molecular cooling) depend on solvent properties. We expect this cooling to be slowest for EtOH  
 139 and fastest for BN, with acetone in the middle. Another important prediction of our simple model is that  
 140 the relaxation kinetics should be almost independent of whether one excites  $Q_y$  directly or indirectly via  
 141 the  $B$ -band. This is because thermalization, even if reasonably slow, is assumed to be much faster than  
 142 molecular cooling, with the latter having no memory of the non-equilibrium vibrational state before  
 143 thermalization. However, the maximum  $T_m$  reached during the heating-cooling cycle should be affected by  
 144 excitation wavelength, as this defines the amount of energy thermalized over the low-frequency vibrations.  
 145 If this were the case, one would predict that, upon direct  $Q_y$  excitation, the time constants of energy  
 146 relaxation would be the same as for  $B$ -band excitation, but the overall changes in the lineshape would be  
 147 much less pronounced.

148 We stress that the results we discuss in this framework are purely qualitative, as modeling the precise effect  
 149 of the heating-cooling cycle on the  $Q_y$  surface is a significant challenge. For example, we neglect entirely  
 150 the possibility of direct energy transfer from the non-equilibrium excited state and the solvent. We also  
 151 ignore the role of extremely low-frequency modes, such as wagging of the phytol tail or libration of the  
 152 tetrapyrrole head in defining the pseudo-equilibrium. The mechanisms of molecular and shell cooling are  
 153 also treated only effectively. Nevertheless, our results point to a promising avenue for further work.

154  
 155  
 156  
 157

**Table T2:** Parameters used for the estimation of heat transfer from molecule to shell ( $\tau_{ms}$ ) and of shell cooling ( $\tau_{sc}$ ).

| Parameter                                    | Ethanol               | Benzonitrile          | Acetone               |
|----------------------------------------------|-----------------------|-----------------------|-----------------------|
| $N_s$                                        | 40.7                  | 17.3                  | 27.7                  |
| $c_s$ (J K <sup>-1</sup> mol <sup>-1</sup> ) | 112                   | 161                   | 126                   |
| $c_m$ (J K <sup>-1</sup> mol <sup>-1</sup> ) | 529                   | 529                   | 529                   |
| $\gamma$ (ps <sup>-1</sup> )                 | 0.18                  | 0.1                   | 0.15                  |
| $R_s$ (nm)                                   | 1.03                  | 0.94                  | 0.99                  |
| $\chi_s$ (nm <sup>2</sup> ps <sup>-1</sup> ) | 8.71x10 <sup>-2</sup> | 9.47x10 <sup>-2</sup> | 9.14x10 <sup>-2</sup> |
| $\tau_{ms}$ (ps)                             | 0.37                  | 0.82                  | 1.03                  |
| $\tau_{sc}$ (ps)                             | 4.03                  | 3.10                  | 3.58                  |

158

159 **Parameter Generation for the Vibrational Cooling Model**  
 160 Parameters for the VC and IC model presented in the previous section were generated via MD simulations.  
 161 For this purpose, a chlorophyll *a* molecule was placed in a cubic simulation box of 10.0 nm edge length and  
 162 solvated with either acetone, benzonitrile or ethanol. Force field parameters for chlorophyll *a* were taken  
 163 from the literature (6, 7). Parameters for ethanol, benzonitrile and acetone were generated with  
 164 antechamber 22.0 (8) using the GAFF2 (9) force field. Partial charges were calculated at the HF/6-31G\* level  
 165 of theory with Gaussian 16 (10) and fitted via restrained electrostatic potential fitting (RESP) (11).  
 166 MD simulations were conducted with Gromacs 2023.2 (12). The same protocol was used for each solvent  
 167 simulation, as described below. First, the energy of the solvated system was minimized with the steepest-  
 168 descent algorithm until the maximum force fell below 500 kJ mol<sup>-1</sup> nm<sup>-1</sup>. The leap-frog integrator was used  
 169 in all following calculations with a time-step of 2 fs. Bonds to hydrogen atoms were constrained using the  
 170 LINCS algorithm (13). Verlet lists (14) were used to calculate the short-range electrostatics, using a cutoff  
 171 distance of 1.2 nm. Long-range electrostatics were evaluated with the smooth particle-mesh Ewald (SPME)  
 172 method (15, 16) using fourth-order interpolation and a Fourier grid spacing of 0.16 nm. Equilibration was  
 173 conducted in three stages: First, the system was annealed for 50 ps from 10 K to 100 K in an NVT ensemble  
 174 and then propagated for another 50 ps at 100 K. The temperature was controlled with the V-rescale  
 175 thermostat (17) using a time constant of  $\tau_T = 0.1$  ps. In the second step, the system was heated to the target  
 176 temperature of 300 K over 100 ps in an NPT ensemble and propagated for 300 ps at constant temperature  
 177 and pressure. The pressure was controlled by the Berendsen barostat (18) using an isotropic reference  
 178 pressure of 1 bar, a time constant of  $\tau_p = 2.5$  ps and isothermal compressibilities of  $11.19 \times 10^{-5}$  bar<sup>-1</sup>  
 179 (ethanol (19))  $4.8 \times 10^{-5}$  bar<sup>-1</sup> (benzonitrile (20)) and  $12.5 \times 10^{-5}$  bar<sup>-1</sup> (acetone (21)). After temperature and  
 180 pressure had stabilized, a third equilibration was performed for 4 ns in an NPT ensemble using the Nosé-  
 181 Hoover thermostat (22, 23) ( $\tau = 2.5$  ps) and the Parrinello-Rahman barostat (24, 25) ( $\tau_p = 10$  ps).  
 182 Equilibration was confirmed by the average temperature and pressure converging to their target values and  
 183 the total energy and density remaining stable. Production simulations were carried out in the equilibrated  
 184 NPT ensembles for 20 ns and 2000 snapshots were extracted in regular intervals of 10 ps.  
 185

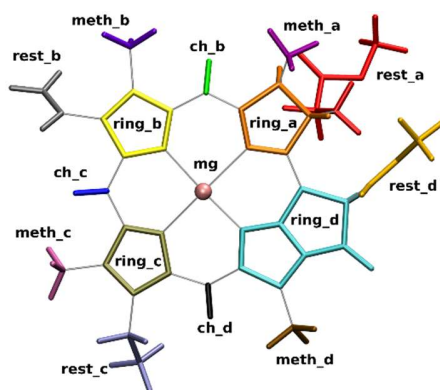

186  
 187  
 188 **Figure S9:** Chlorophyll fragmentation pattern to determine the volume of the first solvation shell. The  
 189 solvation shell is defined by spheres around the center of each fragment.  
 190

191 To determine the volume of the first solvation shell, the chlorophyll molecule was divided into 16 fragments  
 192 as depicted in Figure S9. Although it was part of the MD simulations, the phytol chain attached to the  
 193 fragment denoted as *rest\_a* was not included in the evaluation of the solvation shell. The phytol chain is  
 194 mostly unfolded during the MD and rarely comes into contact with the chromophore. The median distance  
 195 between the outermost carbon atom C20 and the magnesium ion is between 18 Å and 20 Å in all three MD  
 196 simulations. The distance is greater than 10 Å for over 94 % of the total simulation time. It is therefore  
 197 reasonable to assume that vibrational cooling into the solvent occurs on a faster or similar timescale than  
 198 heat dissipation to the phytol chain. To obtain information about the shape of the first solvation shell (FSS),  
 199 the radial distribution function (RDF) between each fragment and the surrounding solvent atoms was

200 calculated and averaged over the entire trajectory. The solvent molecules were modeled by a single  
201 reference atom per molecule for the calculation of the RDF (oxygen for ethanol and acetone, nitrogen for  
202 benzonitrile). The RDF was normalized and smoothed with a Savitzky–Golay filter (26), using quadratic  
203 polynomials and a window size of 15 (ethanol), 20 (acetone) and 25 (benzonitrile) samples. The end of the  
204 first peak of the RDF was used to identify the radius of the FSS for each molecular fragment. This allows to  
205 construct a sphere around the geometric center of each fragment with the radius of the respective solvation  
206 shell. The first frame of each trajectory was used to calculate the fragment centers. The number of solvent  
207 molecules in the resulting shape of overlapping spheres (Figure S10) was counted and averaged over the  
208 trajectory. A molecule is counted as part of the FSS if its geometric center lies within the solvation sphere  
209 of at least one chlorophyll fragment. Moreover, the volume of the solvation shell was estimated numerically  
210 and converted to an effective radius of an idealized spherical shell.  
211

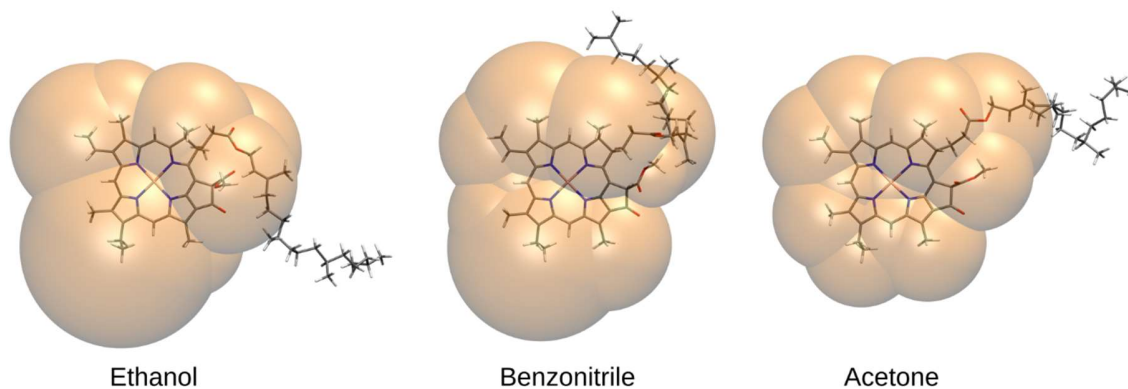

212  
213  
214

**Figure S10:** Visualization of the first solvation shell of chlorophyll a in different solvents.

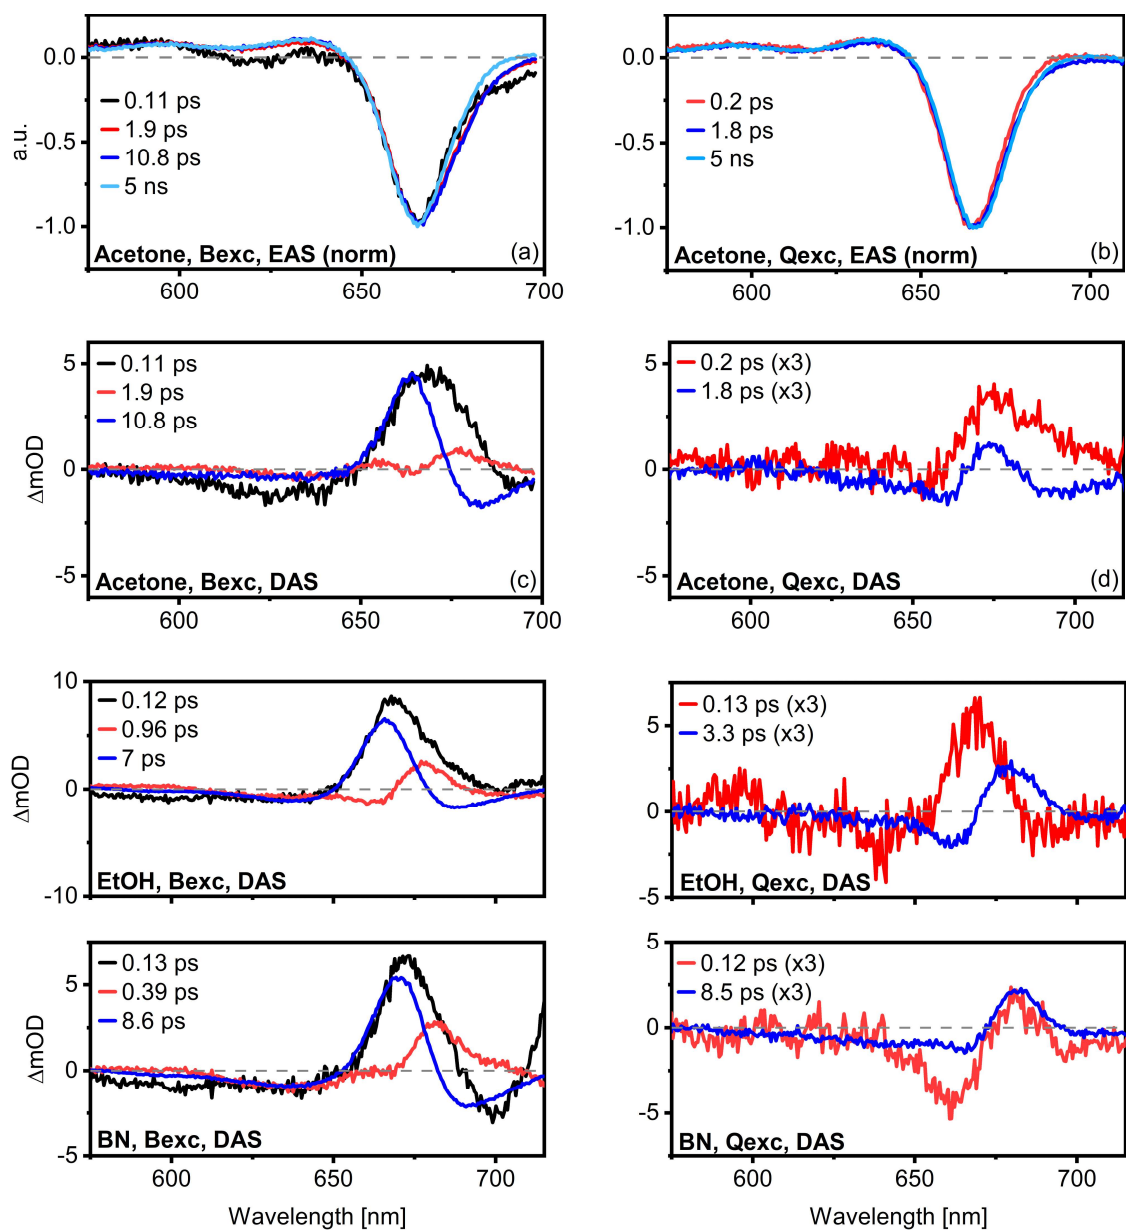

215

216  
 217  
 218  
 219  
 220  
 221  
 222  
 223  
 224  
 225

**Figure S11:** Normalized EAS of Chl *a* in acetone as extracted from GA of Chl *a* after B-band (top left) and Q-band (top right) excitation. A slight broadening is visible on the Q<sub>y</sub> red side at early times. The peak then narrows down with the third component (B-band excitation) or broadens and redshifts slightly (Q-band excitation). The lineshape changes are subtle and can be better seen in the DAS. After B-band excitation, the timescales of broadening and narrowing match the expected IVR and VC timescales. After Q-band excitation, the solvent heating and cooling effect, as predicted, is much less pronounced. We see a (slight) continuous broadening and redshift of the peak up to a few ps, a behavior consistent with the Stokes shift dynamics of Chl *a*. The dynamics are qualitatively identical in all three solvents.

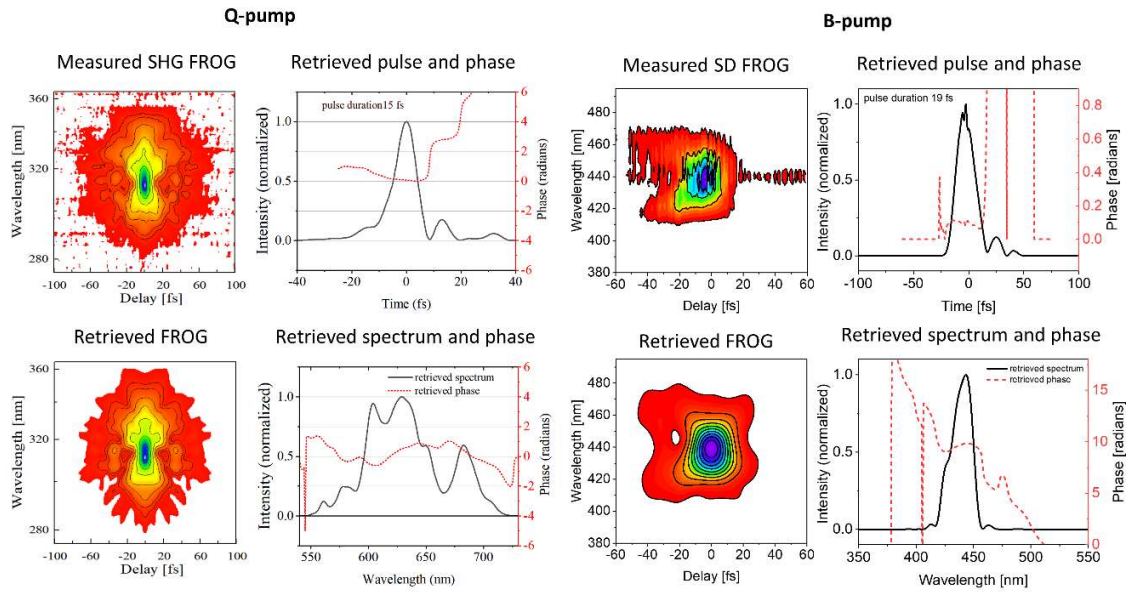

226  
227  
228  
229  
230  
231  
232  
233

**Figure S12:** Measured and retrieved FROG traces for the Q- and B-band excitation pulses as measured by SHG-FROG and SD-FROG, respectively. SHG-FROG was measured using a 10  $\mu\text{m}$  thick BBO with a cutting angle of  $\theta = 36.6^\circ$ . SD-FROG traces were measured using a 70  $\mu\text{m}$  thick microscope coverglass slide. The retrieved spectra and spectral and temporal phases are plotted separately and yield pulse durations of 15 fs (Q-pump) and 19 fs (B-pump). The pulse duration was obtained with a TG X-FROG retrieval software (FROG 3.1.2, Femtsoft Technologies).

234 **References**

- 235
- 236 1. K. Karki, D. Roccatano, Molecular dynamics simulation study of chlorophyll *a* in different  
237 organic solvents. *J. Chem. Theory Comput.* 7, 1131–1140 (2011).
- 238 2. D. M. Leitner, Molecules and the Eigenstate Thermalization Hypothesis. *Entropy* 20, 673  
239 (2018).
- 240 3. V. Balevičius, *et al.*, The full dynamics of energy relaxation in large organic molecules: From  
241 photo-excitation to solvent heating. *Chem. Sci.* 10, 4792–4804 (2019).
- 242 4. S. A. Kovalenko, R. Schanz, H. Hennig, N. P. Ernsting, Cooling dynamics of an optically  
243 excited molecular probe in solution from femtosecond broadband transient absorption  
244 spectroscopy. *J. Chem. Phys.* 115, 3256–3273 (2001).
- 245 5. T. S. Wheeler, On the theory of liquids. *Proc. Indian Acad. Sci. - Sect. A* 4, 291–297 (1936).
- 246 6. M. Ceccarelli, P. Procacci, M. Marchi, An ab initio force field for the cofactors of bacterial  
247 photosynthesis. *J. Comput. Chem.* 24, 129–142 (2003).
- 248 7. L. Zhang, D. A. Silva, Y. Yan, X. Huang, Force field development for cofactors in the  
249 photosystem II. *J. Comput. Chem.* 33, 1969–1980 (2012).
- 250 8. J. Wang, W. Wang, P. A. Kollman, D. A. Case, Automatic atom type and bond type  
251 perception in molecular mechanical calculations. *J. Mol. Graph. Model.* 25, 247–260 (2006).
- 252 9. J. Wang, R. M. Wolf, J. W. Caldwell, P. A. Kollman, D. A. Case, Development and Testing  
253 of a General Amber Force Field. *J. Comp. Chem.* 25, 9, 1157–1174 (2004).
- 254 10. M. J. Frisch, *et al.*, Gaussian 16 Rev. A.03, Wallingford, CT. (2016).
- 255 11. C. I. Bayly, P. Cieplak, W. D. Cornell, P. A. Kollman, A Well-Behaved Electrostatic Potential  
256 Based Method Using Charge Restraints for Deriving Atomic Charges: The RESP Model. *J.*  
257 *Phys. Chem.* 97, 40, 10269–10280 (1993).
- 258 12. M. J. Abraham, *et al.*, Gromacs: High performance molecular simulations through multi-level  
259 parallelism from laptops to supercomputers. *SoftwareX* 1–2, 19–25 (2015).
- 260 13. B. Hess, H. Bekker, H. J. C. Berendsen, J. G. E. M. Fraaije, LINCS: A Linear Constraint  
261 Solver for molecular simulations. *J. Comput. Chem.* 18, 1463–1472 (1997).
- 262 14. S. Páll, B. Hess, A flexible algorithm for calculating pair interactions on SIMD architectures.  
263 *Computer Physics Communications* 184, 2641–2650 (2013).
- 264 15. T. Darden, D. York, L. Pedersen, Particle mesh Ewald: An N·log(N) method for Ewald sums  
265 in large systems. *J. Chem. Phys.* 98, 10089–10092 (1993).
- 266 16. U. Essmann, *et al.*, A smooth particle mesh Ewald method. *J. Chem. Phys.* 103, 8577–8593  
267 (1995).
- 268 17. G. Bussi, D. Donadio, M. Parrinello, Canonical sampling through velocity-rescaling. *J.*  
269 *Chem. Phys.* 126, 014101 (2008).
- 270 18. H. J. C. Berendsen, J. P. M. Postma, W. F. Van Gunsteren, A. Dinola, J. R. Haak, Molecular  
271 dynamics with coupling to an external bath. *J. Chem. Phys.* 81, 3684–3690 (1984).
- 272 19. D. R. Lide, *et al.*, CRC Handbook of Chemistry and Physics. CRC Press/Taylor & Francis  
273 Group, Boca Raton, FL. (2007).
- 274 20. C. Caleman, *et al.*, Force field benchmark of organic liquids: Density, enthalpy of  
275 vaporization, heat capacities, surface tension, isothermal compressibility, volumetric  
276 expansion coefficient, and dielectric constant. *J. Chem. Theory Comput.* 8, 61–74 (2012).
- 277 21. W. A. Adams, K. J. Laidler, Effects of pressure and temperature on the structure of liquid  
278 acetone. *Can. J. Chem.* 45, 123–130 (1967).
- 279 22. W. G. Hoover, Canonical dynamics: Equilibrium phase-space distributions. *Phys. Rev. A*  
280 31, 1695–1697 (1985).
- 281 23. S. Nosé, A molecular dynamics method for simulations in the canonical ensemble. *Mol.*  
282 *Phys.* 52, 255–268 (1984).

- 283 24. M. Parrinello, A. Rahman, Polymorphic transitions in single crystals: A new molecular  
284 dynamics method. *J. Appl. Phys.* 52, 7182–7190 (1981).  
285 25. S. Nosé, M. L. Klein, Constant pressure molecular dynamics for molecular systems. *Mol.*  
286 *Phys.* 50, 1055–1076 (1983).  
287 26. A. Savitzky, M. J. E. Smoothing and Differentiation of Data by Simplified Least Squares  
288 Procedures. *Anal. Chem.* 36, 8, 1627–1639 (1964).
